# Supplementary material for: Inter-residue through-space scalar 19 F– 19 F couplings between CH 2 F groups in a protein
Source: Copernicus journal article supplement (doi:10.5194/mr-2025-4), 2025-03-19
Supplement: Supplementary file [file mr-2025-4-AC1-supplement.pdf]

We recorded a [ $^{19}\text{F}$ , $^{19}\text{F}$ ]-TOCSY spectrum of GB1 made with deuterated 5,5'-difluoro-L-leucine (where all protons of the fluorinated isopropyl groups are replaced by deuterons). The spectrum, shown underneath, shows all the strong cross-peaks of the spectrum of Figure 6a in the main text.

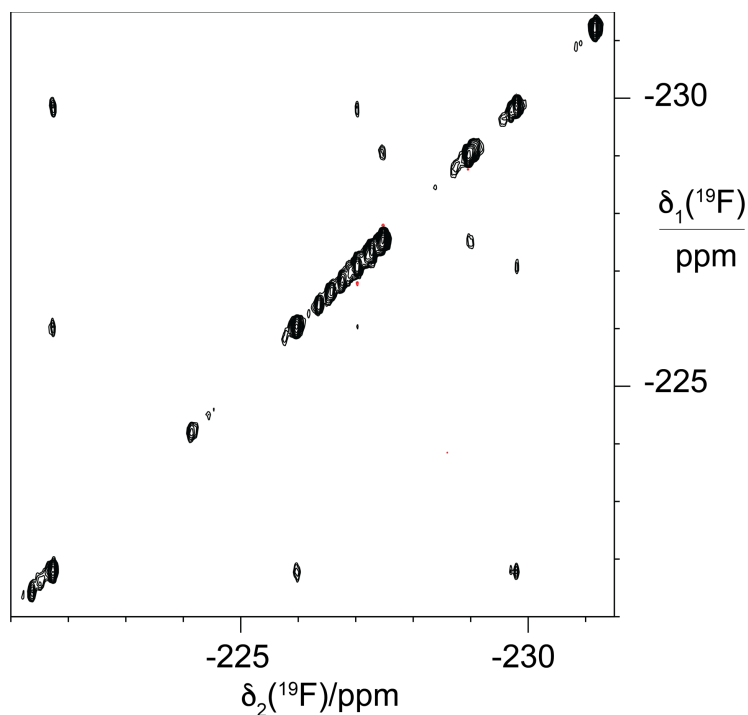

Figure 1. [ $^{19}\text{F}$ , $^{19}\text{F}$ ]-TOCSY spectrum of a 0.5 mM solution of GB1 made with deuterated 5,5'-difluoro-L-leucine. Parameters: mixing time 55 ms,  $t_{1\text{max}} = 6$  ms,  $t_{2\text{max}} = 97$  ms, total recording time 15 h, 400 MHz NMR spectrometer.

The article by Blake et al. (J. Biomol. NMR, 2, 527, <https://doi.org/10.1007/BF02192814>, 1992) reported small through-space scalar couplings in rubredoxin between the methyl protons of Ala 43 and heavy metal ions ( $^{113}\text{Cd}$ ,  $^{199}\text{Hg}$ ). In our case, we find no sign of through-space couplings between  $^{19}\text{F}$  and other spins. If they were a common occurrence, we would expect to observe through-space  $^{19}\text{F}$ - $^1\text{H}$  couplings for some of the protons that show the strongest NOEs in the HOESY spectra. Neither the COSY spectrum of Figure 5 nor the short-delay  $^1\text{H}$ , $^{19}\text{F}$  correlation experiments showed any evidence for this. Fluorine bonded to carbon features more hydrophobic than H-bond acceptor characteristics. The leucine methyls of GB1 are not near H-bond donors or heavy atoms.

To the best of our knowledge, scalar  $^{19}\text{F}$ - $^{19}\text{F}$  couplings mediated by electrons of an intervening chemical group have been reported only once, where the intervening group was the  $\pi$ -bond system of a phenyl ring, see Mallory et al. (J. Am. Chem. Soc., 112, 2577, <https://doi.org/10.1021/ja00163a015>, 1990).
