# Supplementary material for: Inter-residue through-space scalar 19 F– 19 F couplings between CH 2 F groups in a protein
Source: Copernicus journal article supplement (doi:10.5194/mr-2025-4), 2025-03-19
Supplement: Supplementary file [file mr-2025-4-AC2-supplement.pdf]

**Table.**  $R_{1\rho}(^{19}\text{F})$  values measured in CPMG experiments with different spacing between  $180^\circ$  pulses and comparison with  $R_2^*$  values.<sup>a</sup>

| Sequence position and stereospecific assignment | GB1-d, $R_{1\rho}$ with 1250 Hz CPMG <sup>b</sup> | GB1-d, $R_{1\rho}$ with 31 Hz CPMG <sup>c</sup> | GB1-d-D, $R_{1\rho}$ with 1250 Hz CPMG <sup>d</sup> | GB1-d, $R_2^*$ <sup>e</sup> |
|-------------------------------------------------|---------------------------------------------------|-------------------------------------------------|-----------------------------------------------------|-----------------------------|
| 5, $\delta 2$                                   | 31 (1)                                            | 37 (3)                                          | 15 (1)                                              | 53                          |
| 7, $\delta 2$                                   | 15.9 (0.2)                                        | 25 (1)                                          | 10 (1)                                              | 24                          |
| 12, $\delta 2$                                  | 8.3 (0.5)                                         | 11.7 (0.2)                                      | 3.1 (0.5)                                           | 23                          |
| 12, $\delta 1$                                  | 6.8 (0.4)                                         | 8.6 (0.1)                                       | 3.7 (0.5)                                           | 23                          |
| 59, $\delta 1$                                  | 7.3 (0.2)                                         | 12.5 (0.7)                                      | 4.9 (0.3)                                           | 21                          |
| 59, $\delta 2$                                  | 7.8 (0.7)                                         | 11.2 (0.4)                                      | 3.6 (0.4)                                           | 21                          |
| 7, $\delta 1$                                   | 13.6 (0.2)                                        | 26 (1)                                          | 9.1 (0.4)                                           | 29                          |
| 5, $\delta 1$                                   | 37 (1)                                            | 33 (4)                                          | 20 (1)                                              | 56                          |

<sup>a</sup> Measured on a 400 MHz NMR spectrometer.  $R_{1\rho}$  and  $R_2^*$  values given in  $\text{s}^{-1}$ , showing the standard deviation of fitting in brackets.  $R_2^*$  values were determined by measuring the full width at half height in 1D  $^{19}\text{F}$ -NMR spectra (in Hz) and multiplying by  $\pi$ . GB1-d refers to the samples made with diFLeu residues. GB1-d-D refers to samples made with diFLeu residues, where all five protons of the isopropyl group are replaced by deuterium.

<sup>b</sup> Using 0.4 ms spacing between  $180^\circ$  pulses. Relaxation delays used were 0.8, 16.8, 32.8, 40.8, 56.8, 72.8, 88.8, 104.8 ms.

<sup>c</sup> Using 16 ms spacing between  $180^\circ$  pulses. Relaxation delays used were 32, 48, 64, 80, 96, 112, 128, 144 ms.

<sup>d</sup> Using 0.4 ms spacing between  $180^\circ$  pulses. Relaxation delays used were 0.8, 7.2, 13.6, 20, 26.4, 32.8 39.2, 45.6, 52, 58.4, 64.8, 71.2, 77.6 ms.

<sup>e</sup> 1D  $^{19}\text{F}$ -NMR spectrum measured with 2800 Hz GARP decoupling of  $^1\text{H}$  during 144 ms data acquisition.

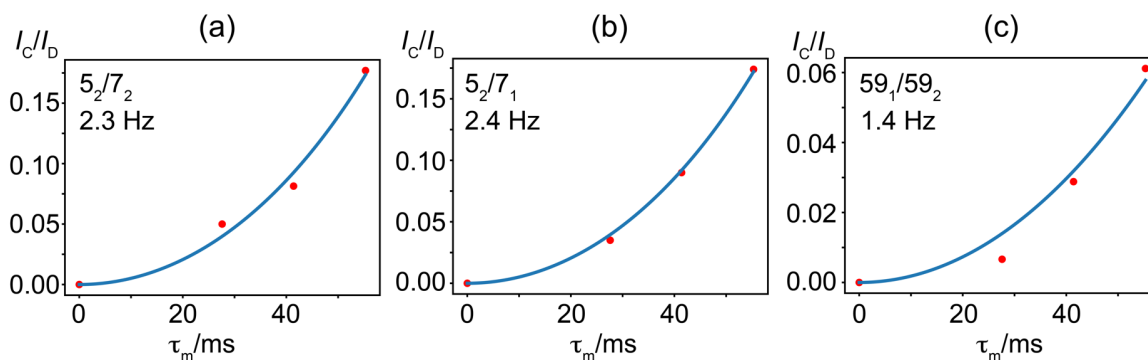

**Figure.** Plots of the function  $I_C/I_D = \tan^2(\pi J_{FF}\tau_m)$  versus the TOCSY mixing time  $\tau_m$  for three cross-peaks between  $CD_2F$  groups in GB1-d made with the diFLeu version, where all five protons of the isopropyl group are replaced by deuterium (Figure S4).  $I_C$  and  $I_D$  denote the integrals of, respectively, the cross-peaks and diagonal peaks measured in a one-dimensional cross-section. The cross-peaks are between residues 5 and 7 (a and b), and within the solvent-exposed residue 59 (c). Subscripts report the stereospecific assignments of the  $CD_2F$  groups. The  $J_{FF}$  couplings determined from best fits are indicated. The fits were based on the simplifying approximation of a 2-spin system, where the cross-peak intensity grows with  $\sin^2(\pi J_{FF}\tau_m)$  and the diagonal peak decays with  $\cos^2(\pi J_{FF}\tau_m)$  (Braunschweiler and Ernst, 1983).

## Reference

Braunschweiler, L. and Ernst, R. R.: Coherence transfer by isotropic mixing – application to proton correlation spectroscopy, J. Magn. Reson. 53, 512–528, [https://doi.org/10.1016/0022-2364\(83\)90226-3](https://doi.org/10.1016/0022-2364(83)90226-3), 1983.
