# Supplementary material for: Inter-residue through-space scalar 19 F– 19 F couplings between CH 2 F groups in a protein
Source: Copernicus journal article supplement (doi:10.5194/mr-2025-4), 2025-03-19
Supplement: Supplementary file [file mr-2025-4-AC3-supplement.pdf]

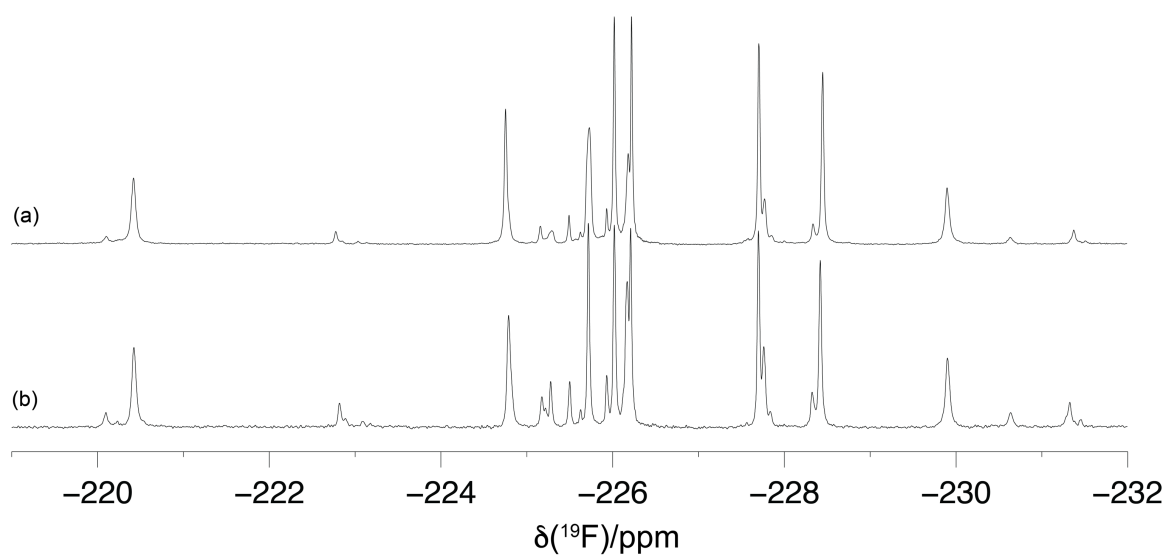

**Figure.** 1D  ${}^{19}\text{F}$ -NMR spectra of two different preparations of GB1-d. (a) 3 mM solution in 50 mM HEPES buffer, pH 7.5, 100 mM NaCl. (b) 1 mM solution in 20 mM MES buffer, pH 6.5, 100 mM NaCl. The  ${}^{19}\text{F}$  chemical shifts are insensitive to the solution conditions.
